# Supplementary material for: Differential contractile response of critically ill patients to neuromuscular electrical stimulation
Source: Springer Nature journal article supplement (doi:10.1186/s13054-019-2540-4), 2019-09-10

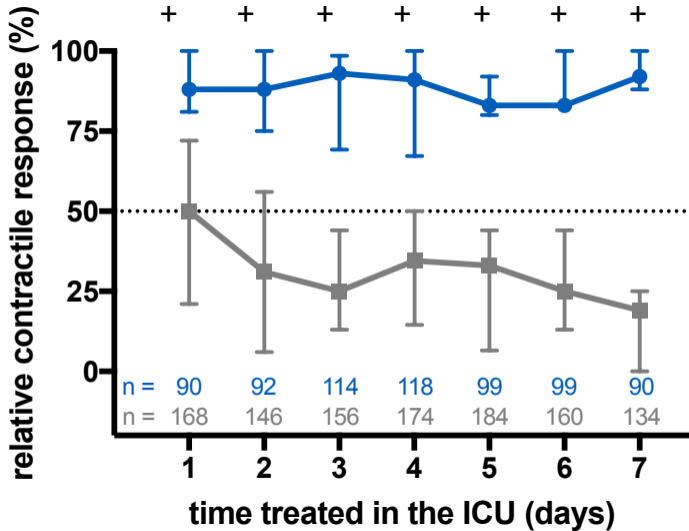

Supplement: MOESM2 [file 17158176]
