# Supplementary material for: Differential contractile response of critically ill patients to neuromuscular electrical stimulation
Source: Springer Nature journal article supplement (doi:10.1186/s13054-019-2540-4), 2019-09-10
Supplement: MOESM3 [file 17158176]

**Table S1. Electrical current necessary for a contractile response**

|                                 | All patients      | Responders         | non-Responders   | p-value |
|---------------------------------|-------------------|--------------------|------------------|---------|
| M. biceps brachii right (mV)    | 83.3 [35.7/100.0] | 92.9 [83.3/100.0]  | 54.8 [22.5/81.7] | 0.005   |
| M. biceps brachii left (mV)     | 83.3 [20.0/92.9]  | 83.3 [83.3/100.0]  | 57.1 [20.0/84.5] | 0.167   |
| M. triceps brachii right (mV)   | 81.7 [53.6/92.9]  | 92.9 [84.5/100.0]  | 61.9 [23.8/80.0] | 0.001   |
| M. triceps brachii left (mV)    | 83.3 [16.7/85.7]  | 85.7 [84.5/100.0]  | 29.8 [14.3/79.2] | 0.004   |
| Wrist extensors right (mV)      | 84.5 [75.7/100.0] | 92.9 [83.3/100.0]  | 83.3 [57.1/92.9] | 0.208   |
| Wrist extensors left (mV)       | 75.0 [63.3/85.7]  | 100.0 [84.5/100.0] | 66.7 [39.3/77.5] | 0.004   |
| Wrist flexors right (mV)        | 81.7 [71.4/100.0] | 100.0 [91.7/100.0] | 73.2 [40.0/90.0] | 0.012   |
| Wrist flexors left (mV)         | 83.3 [60.0/100.0] | 100.0 [91.7/100.0] | 65.7 [28.6/90.0] | 0.013   |
| M. vastus lateralis right (mV)  | 0.0 [0.0/66.7]    | 76.2 [66.7/100.0]  | 0.0 [0.0/0.0]    | < 0.001 |
| M. vastus lateralis left (mV)   | 0.0 [0.0/66.7]    | 77.4 [66.7/92.9]   | 0.0 [0.0/0.0]    | < 0.001 |
| Knee flexors right (mV)         | 0.0 [0.0/16.7]    | 16.7 [0.0/84.5]    | 0.0 [0.0/0.0]    | 0.185   |
| Knee flexors left (mV)          | 14.3 [0.0/33.3]   | 46.4 [16.7/65.0]   | 0.0 [0.0/14.3]   | 0.013   |
| M. tibialis anterior right (mV) | 42.9 [0.0/92.9]   | 100.0 [92.9/100.0] | 0.0 [0.0/41.4]   | < 0.001 |
| M. tibialis anterior left (mV)  | 42.9 [0.0/84.5]   | 85.7 [75.0/92.9]   | 0.0 [0.0/35.7]   | 0.003   |
| M. triceps surae right (mV)     | 28.6 [0.0/100.0]  | 100.0 [92.9/100.0] | 7.1 [0.0/26.8]   | < 0.001 |
| M. triceps surae left (mV)      | 57.1 [7.1/84.5]   | 85.7 [83.3/100.0]  | 21.4 [0.0/66.1]  | 0.003   |

Values for metric variables are presented as median and interquartile range and for categorical variables as count and percentages. Mann-Whitney U or Chi-Square Test were used to calculate statistical significance. P-value represents comparison between responders and non responders.
