# Supplementary material for: Differential contractile response of critically ill patients to neuromuscular electrical stimulation
Source: Crit Care. 2019 Sep 10;23:308. doi: 10.1186/s13054-019-2540-4 (PMC6737711; doi:10.1186/s13054-019-2540-4)
Supplement: Supplementary file 1 — Table S2. a Neuromuscular electrical stimulation reporting: protocol specifications. Specifications of the developed NMES protocol. b Neuromuscular electrical stimulation reporting: stimulation and contraction specifications. Specification of the applied NMES. Electrical current shows the median electrical current applied to patients with a positive contractile response per muscle group and day. Contractile response shows the percentage of patients with a positive contractile response per muscle group and day. (XLSX 19 kb) [file 13054_2019_2540_MOESM1_ESM.xlsx]

## Sheet: Protocol
Reporting: NMES in critically ill patients
Title:	Differential contractile response of critically ill patients to neuromuscular electrical stimulation
Authors:	Julius J. Grunow1, Moritz Goll1, Niklas M. Carbon1, Max E. Liebl2, Steffen Weber-Carstens1,3 and Tobias Wollersheim1,3
Affiliations:	1. Department of Anesthesiology and Operative Intensive Care Medicine (CCM, CVK), Charité – Universitätsmedizin Berlin, corporate member of Freie Universität Berlin, Humboldt Universität zu Berlin and Berlin Institute of Health, Augustenburger Platz 1, 13357 Berlin, Germany 2. Department of Physical Medicine and Rehabilitation, Charité – Universitätsmedizin Berlin, corporate member of Freie Unive…
NMES unit	MUSKELaktiv 2-Kanal, schwa-medico®, Germany/ Physiomed-Expert-2-Kanal, Physiomed®, Germany
Muscle groups	M. tibialis anterior, M. triceps surae, M. vastus lateralis, posterior thigh, M. biceps brachii, M. triceps brachii, wrist extensors, wrist flexors
Stimulation duration	minutes	20
On/Off-Time	seconds	6/10 and 10/15
Electrical current	mV	increased to 70 mV, until contraction or pain threshold; 40 mV if no contraction was present
Frequency	Hz	50
Pulse width	ms	350
Ramp	seconds	1
Electrode size	cm	5x5
Contraction validation	visiable, palpable or reported by the patient
Dosage adjustment	none
Differential contractile response of critically ill patients to neuromuscular electrical stimulation
Julius J. Grunow1, Moritz Goll1, Niklas M. Carbon1, Max E. Liebl2, Steffen Weber-Carstens1,3 and Tobias Wollersheim1,3
1. Department of Anesthesiology and Operative Intensive Care Medicine (CCM, CVK), Charité – Universitätsmedizin Berlin, corporate member of Freie Universität Berlin, Humboldt Universität zu Berlin and Berlin Institute of Health, Augustenburger Platz 1, 13357 Berlin, Germany 2. Department of Physical Medicine and Rehabilitation, Charité – Universitätsmedizin Berlin, corporate member of Freie Unive…
Table S2a. Neuromuscular electrical stimulation reporting: protocol specifications

## Sheet: Results
Reporting: NMES in critically patients
Title:	Differential contractile response of critically ill patients to neuromuscular electrical stimulation
Authors:	Julius J. Grunow1, Moritz Goll1, Niklas M. Carbon1, Max E. Liebl2, Steffen Weber-Carstens1,3 and Tobias Wollersheim1,3
Affiliations:	1. Department of Anesthesiology and Operative Intensive Care Medicine (CCM, CVK), Charité – Universitätsmedizin Berlin, corporate member of Freie Universität Berlin, Humboldt Universität zu Berlin and Berlin Institute of Health, Augustenburger Platz 1, 13357 Berlin, Germany 2. Department of Physical Medicine and Rehabilitation, Charité – Universitätsmedizin Berlin, corporate member of Freie Unive…
treatment day			1	2	3	4	5	6	7	8	9	10	11	12	13	14	15	16	17	18	19	20	21	22	23	24	25	26	27	28
Flexors elbow left	Electrical current	mV	51.0	43.0	45.5	50.0	45.0	48.0	50.0
	Contractile reponse	%	92.9	60.0	64.7	50.0	64.7	68.8	41.7
Extensors elbow left	Electrical current	mV	35.0	37.0	38.5	45.0	46.3	43.0	40.5
	Contractile reponse	%	60.0	50.0	58.8	72.2	60.0	56.3	46.2
Flexors wrist left	Electrical current	mV	48.8	39.0	44.5	52.0	49.0	36.0	35.3
	Contractile reponse	%	91.7	73.3	70.6	72.2	82.4	62.5	53.8
Extensors wrist left	Electrical current	mV	44.5	41.0	42.0	50.8	54.0	45.0	36.8
	Contractile reponse	%	73.3	78.6	47.1	66.7	88.2	81.3	53.8
Flexors knee left	Electrical current	mV	45.0	51.8	40.5	42.5	54.8	50.0	xxx
	Contractile reponse	%	16.7	13.3	29.4	31.6	11.8	29.4	13.3
Extensors knee left	Electrical current	mV	53.0	52.3	57.5	47.0	62.0	50.0	52.5
	Contractile reponse	%	42.1	37.5	33.3	26.3	22.2	27.8	25.0
Flexors ankle left	Electrical current	mV	46.0	55.0	40.5	49.0	38.5	32.0	45.0
	Contractile reponse	%	68.8	57.1	43.8	55.6	35.3	33.3	50.0
Extensors ankle left	Electrical current	mV	45.5	53.0	43.3	48.5	39.8	37.0	48.5
	Contractile reponse	%	55.6	53.3	41.2	44.4	35.3	31.1	40.0
Flexors elbow right	Electrical current	mV	42.5	47.5	35.0	36.5	36.8	45.0	40.0
	Contractile reponse	%	86.7	75.0	58.8	61.1	61.1	82.4	64.3
Extensors elbow right	Electrical current	mV	33.5	39.5	32.0	35.0	39.0	45.0	43.0
	Contractile reponse	%	75.0	66.7	64.7	66.7	68.8	70.6	69.2
Flexors wrist right	Electrical current	mV	39.0	42.0	40.0	45.0	48.5	48.0	33.5
	Contractile reponse	%	78.6	73.3	70.6	77.8	82.4	81.3	61.5
Extensors wrist right	Electrical current	mV	44.0	47.0	32.5	45.0	43.8	41.0	38.0
	Contractile reponse	%	94.1	85.7	58.8	83.3	76.5	68.8	69.2
Flexors knee right	Electrical current	mV	50.0	xxx	45.0	42.5	50.0	60.0	43.0
	Contractile reponse	%	22.2	6.7	25.0	22.2	16.7	23.5	31.6
Extensors knee right	Electrical current	mV	28.5	51.0	40.5	46.5	50.0	39.5	45.0
	Contractile reponse	%	31.6	31.3	41.2	27.8	27.8	33.3	25.0
Flexors ankle right	Electrical current	mV	39.5	46.0	40.0	37.0	38.5	40.5	44.0
	Contractile reponse	%	53.3	50.0	56.3	50.0	35.3	28.6	50.0
Extensors ankle right	Electrical current	mV	47.0	52.0	32.3	40.8	38.0	39.5	45.5
	Contractile reponse	%	52.9	53.3	41.2	44.4	41.2	37.5	46.7
Differential contractile response of critically ill patients to neuromuscular electrical stimulation
Julius J. Grunow1, Moritz Goll1, Niklas M. Carbon1, Max E. Liebl2, Steffen Weber-Carstens1,3 and Tobias Wollersheim1,3
1. Department of Anesthesiology and Operative Intensive Care Medicine (CCM, CVK), Charité – Universitätsmedizin Berlin, corporate member of Freie Universität Berlin, Humboldt Universität zu Berlin and Berlin Institute of Health, Augustenburger Platz 1, 13357 Berlin, Germany 2. Department of Physical Medicine and Rehabilitation, Charité – Universitätsmedizin Berlin, corporate member of Freie Unive…
Table S2b. Neuromuscular electrical stimulation reporting: stimulation and contraction specifications
Specification of the applied NMES. Electrical current shows the median electrical current applied to patients with a positive contractile response per muscle group and day. Contractile response shows the percentage of patients with a positive contractile response per muscle group and day. Xxx represents days and muscle groups where an insufficient number of patients had a contractile response to …
