# Supplementary material for: Differential contractile response of critically ill patients to neuromuscular electrical stimulation
Source: Crit Care. 2019 Sep 10;23:308. doi: 10.1186/s13054-019-2540-4 (PMC6737711; doi:10.1186/s13054-019-2540-4)
Supplement: Supplementary file 4 — Standardised NMES Reporting Sheet. Standardised NMES reporting sheet for NMES protocol and stimulation specifications. (XLSX 17 kb) [file 13054_2019_2540_MOESM4_ESM.xlsx]

## Sheet: Protocol
Reporting: NMES in critically ill patients
Title:
Authors:
Affiliations:
NMES unit
Muscle groups	unit
Stimulation duration	unit
On/Off-Time	unit
Electrical current	unit
Frequency	unit
Pulse width	unit
Ramp	unit
Electrode size	unit
Contraction validation
Dosage adjustment
Differential contractile response of critically ill patients to neuromuscular electrical stimulation
Julius J. Grunow1, Moritz Goll1, Niklas M. Carbon1, Max E. Liebl2, Steffen Weber-Carstens1,3 and Tobias Wollersheim1,3
1. Department of Anesthesiology and Operative Intensive Care Medicine (CCM, CVK), Charité – Universitätsmedizin Berlin, corporate member of Freie Universität Berlin, Humboldt Universität zu Berlin and Berlin Institute of Health, Augustenburger Platz 1, 13357 Berlin, Germany 2. Department of Physical Medicine and Rehabilitation, Charité – Universitätsmedizin Berlin, corporate member of Freie Unive…

## Sheet: Results
Reporting: NMES in critically patients
Title:	0
Authors:	0
Affiliations:	0
treatment day			1	2	3	4	5	6	7	8	9	10	11	12	13	14	15	16	17	18	19	20	21	22	23	24	25	26	27	28
Flexors elbow left	Electrical current	mV
	Contractile reponse	unit
Extensors elbow left	Electrical current	mV
	Contractile reponse	unit
Flexors wrist left	Electrical current	mV
	Contractile reponse	unit
Extensors wrist left	Electrical current	mV
	Contractile reponse	unit
Flexors knee left	Electrical current	mV
	Contractile reponse	unit
Extensors knee left	Electrical current	mV
	Contractile reponse	unit
Flexors ankle left	Electrical current	mV
	Contractile reponse	unit
Extensors ankle left	Electrical current	mV
	Contractile reponse	unit
Flexors elbow right	Electrical current	mV
	Contractile reponse	unit
Extensors elbow right	Electrical current	mV
	Contractile reponse	unit
Flexors wrist right	Electrical current	mV
	Contractile reponse	unit
Extensors wrist right	Electrical current	mV
	Contractile reponse	unit
Flexors knee right	Electrical current	mV
	Contractile reponse	unit
Extensors knee right	Electrical current	mV
	Contractile reponse	unit
Flexors ankle right	Electrical current	mV
	Contractile reponse	unit
Extensors ankle right	Electrical current	mV
	Contractile reponse	unit
Differential contractile response of critically ill patients to neuromuscular electrical stimulation
Julius J. Grunow1, Moritz Goll1, Niklas M. Carbon1, Max E. Liebl2, Steffen Weber-Carstens1,3 and Tobias Wollersheim1,3
1. Department of Anesthesiology and Operative Intensive Care Medicine (CCM, CVK), Charité – Universitätsmedizin Berlin, corporate member of Freie Universität Berlin, Humboldt Universität zu Berlin and Berlin Institute of Health, Augustenburger Platz 1, 13357 Berlin, Germany 2. Department of Physical Medicine and Rehabilitation, Charité – Universitätsmedizin Berlin, corporate member of Freie Unive…
